# Supplementary material for: Okanin, effective constituent of the flower tea Coreopsis tinctoria, attenuates LPS-induced microglial activation through inhibition of the TLR4/NF-κB signaling pathways
Source: PubMed Central journal article supplement (PMC5377376; doi:10.1038/srep45705), 2017-04-03
Supplement: srep45705-s1.pdf [file srep45705-s1.pdf]

Okanin, effective constituent of the flower tea *Coreopsis tinctoria*,  
attenuates LPS-induced microglial activation through inhibition of the  
TLR4/NF- $\kappa$ B signaling pathways

Yue Hou<sup>1</sup>, Guoxun Li<sup>1</sup>, Jian Wang<sup>2</sup>, Yingni Pan<sup>3</sup>, Kun Jiao<sup>1</sup>, Juan Du<sup>1</sup>, Ru Chen<sup>1</sup>, Bing Wang<sup>1\*</sup> & Ning Li<sup>3,\*</sup>

<sup>1</sup>College of Life and Health Sciences, Northeastern University, Shenyang 110819, China

<sup>2</sup>School of Pharmaceutical Engineering, Shenyang Pharmaceutical University, Shenyang 110016, China

<sup>3</sup>School of Traditional Chinese Materia Medica, Key Laboratory of Structure-Based Drug Design and Discovery, Shenyang Pharmaceutical University, Ministry of Education, Shenyang 110016, China

Supplementary Figure 1A. Full-length blots of iNOS (up) and  $\beta$ -actin (down).

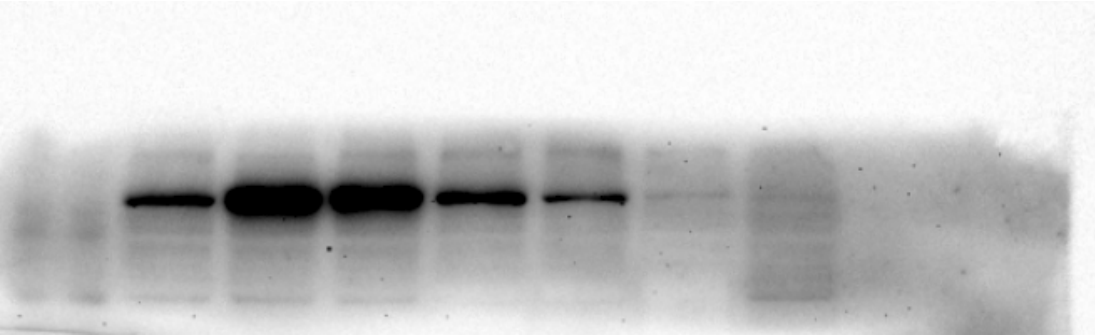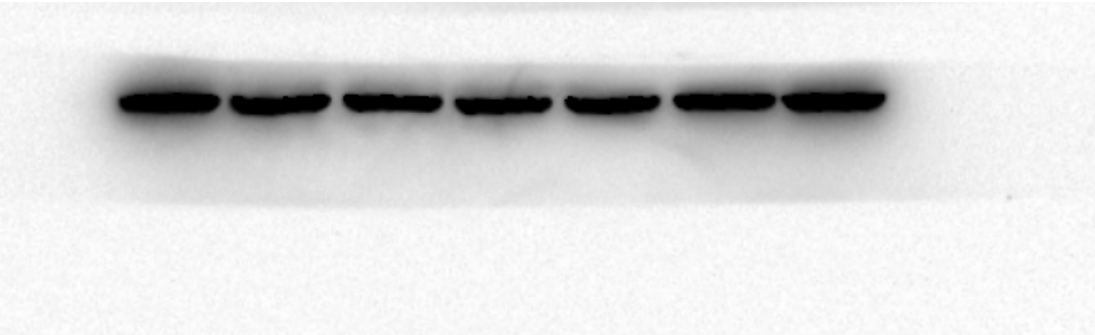

|                   |   |   |   |    |    |     |    |
|-------------------|---|---|---|----|----|-----|----|
| LPS               | - | + | + | +  | +  | +   | +  |
| Okanin ( $\mu$ M) | - | - | 1 | 10 | 30 | 100 | -  |
| MINO ( $\mu$ M)   | - | - | - | -  | -  | -   | 30 |

Supplementary Figure 1B. Multiple exposures of full-length blots of iNOS.

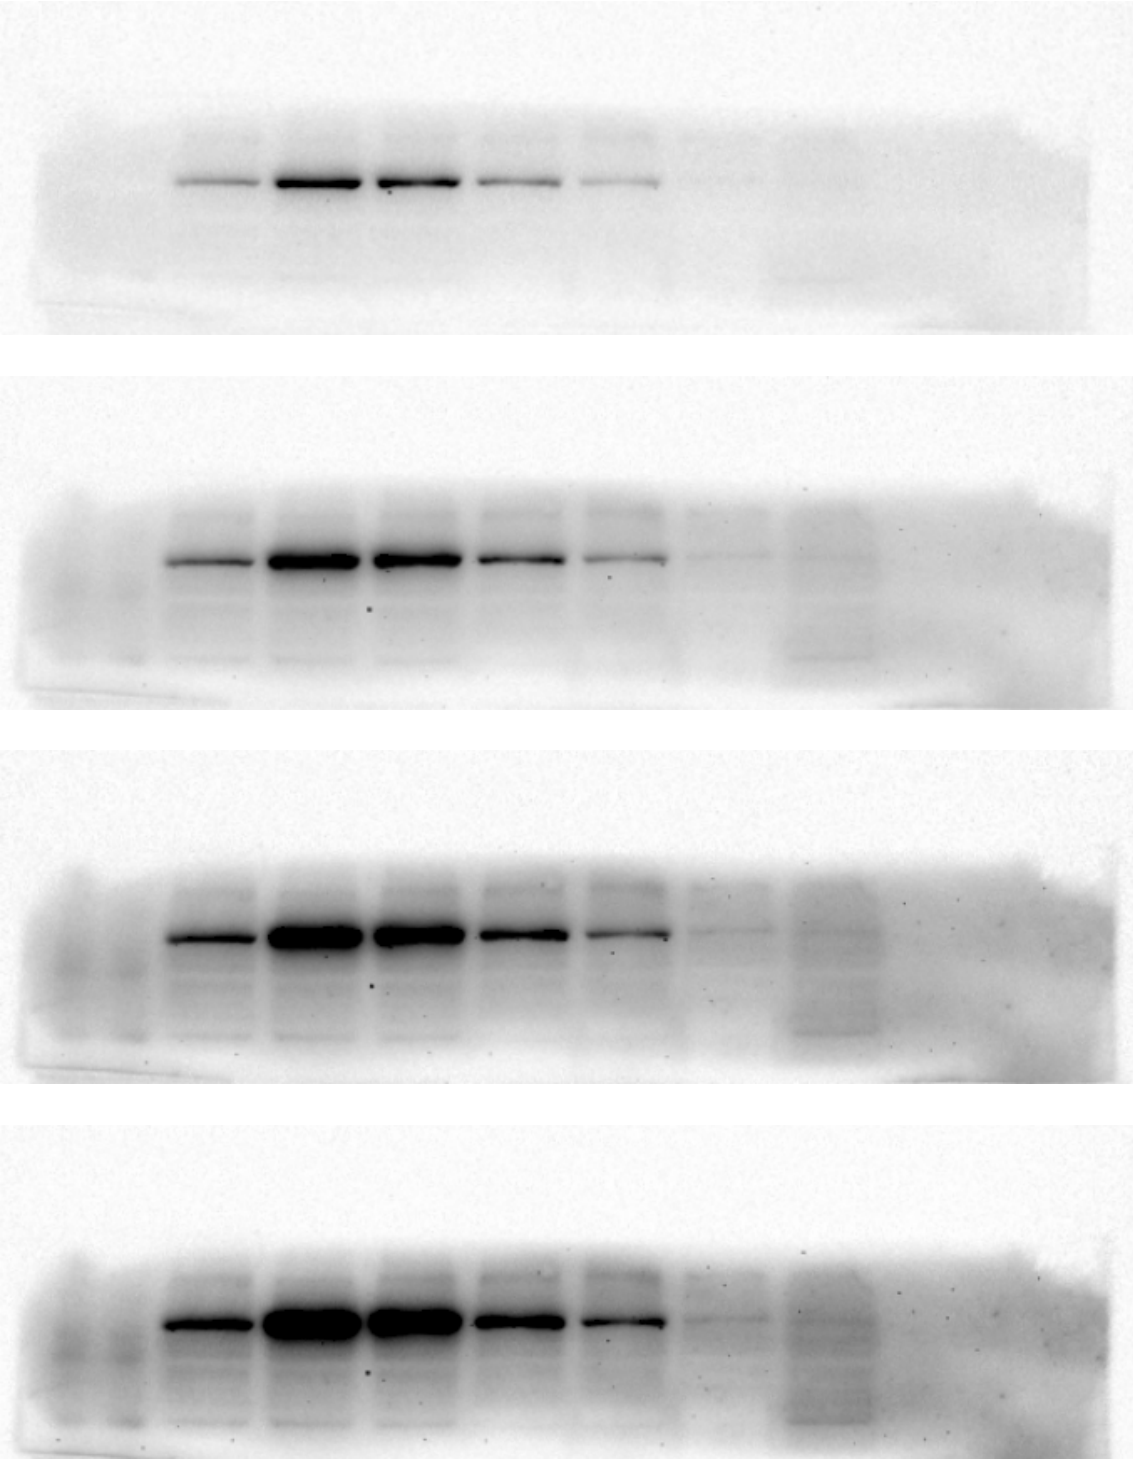

|             |   |   |   |    |    |     |    |
|-------------|---|---|---|----|----|-----|----|
| LPS         | - | + | + | +  | +  | +   | +  |
| Okanin (μM) | - | - | 1 | 10 | 30 | 100 | -  |
| MINO (μM)   | - | - | - | -  | -  | -   | 30 |

Supplementary Figure 2A. Full-length blots of p-I $\kappa$ B $\alpha$  (up) and  $\beta$ -actin (down).

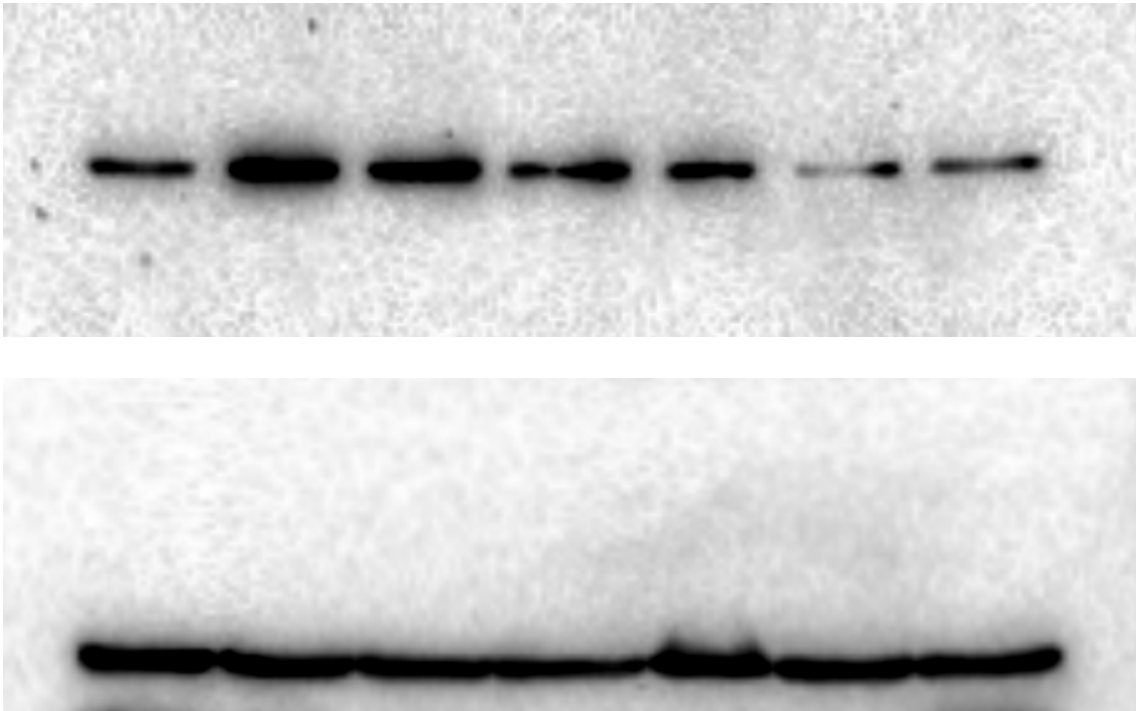

|                   |   |   |   |    |    |     |    |
|-------------------|---|---|---|----|----|-----|----|
| LPS               | - | + | + | +  | +  | +   | +  |
| Okanin ( $\mu$ M) | - | - | 1 | 10 | 30 | 100 | -  |
| MINO ( $\mu$ M)   | - | - | - | -  | -  | -   | 30 |

Supplementary Figure 2B. Multiple exposures of full-length blots of p-I $\kappa$ B $\alpha$ .

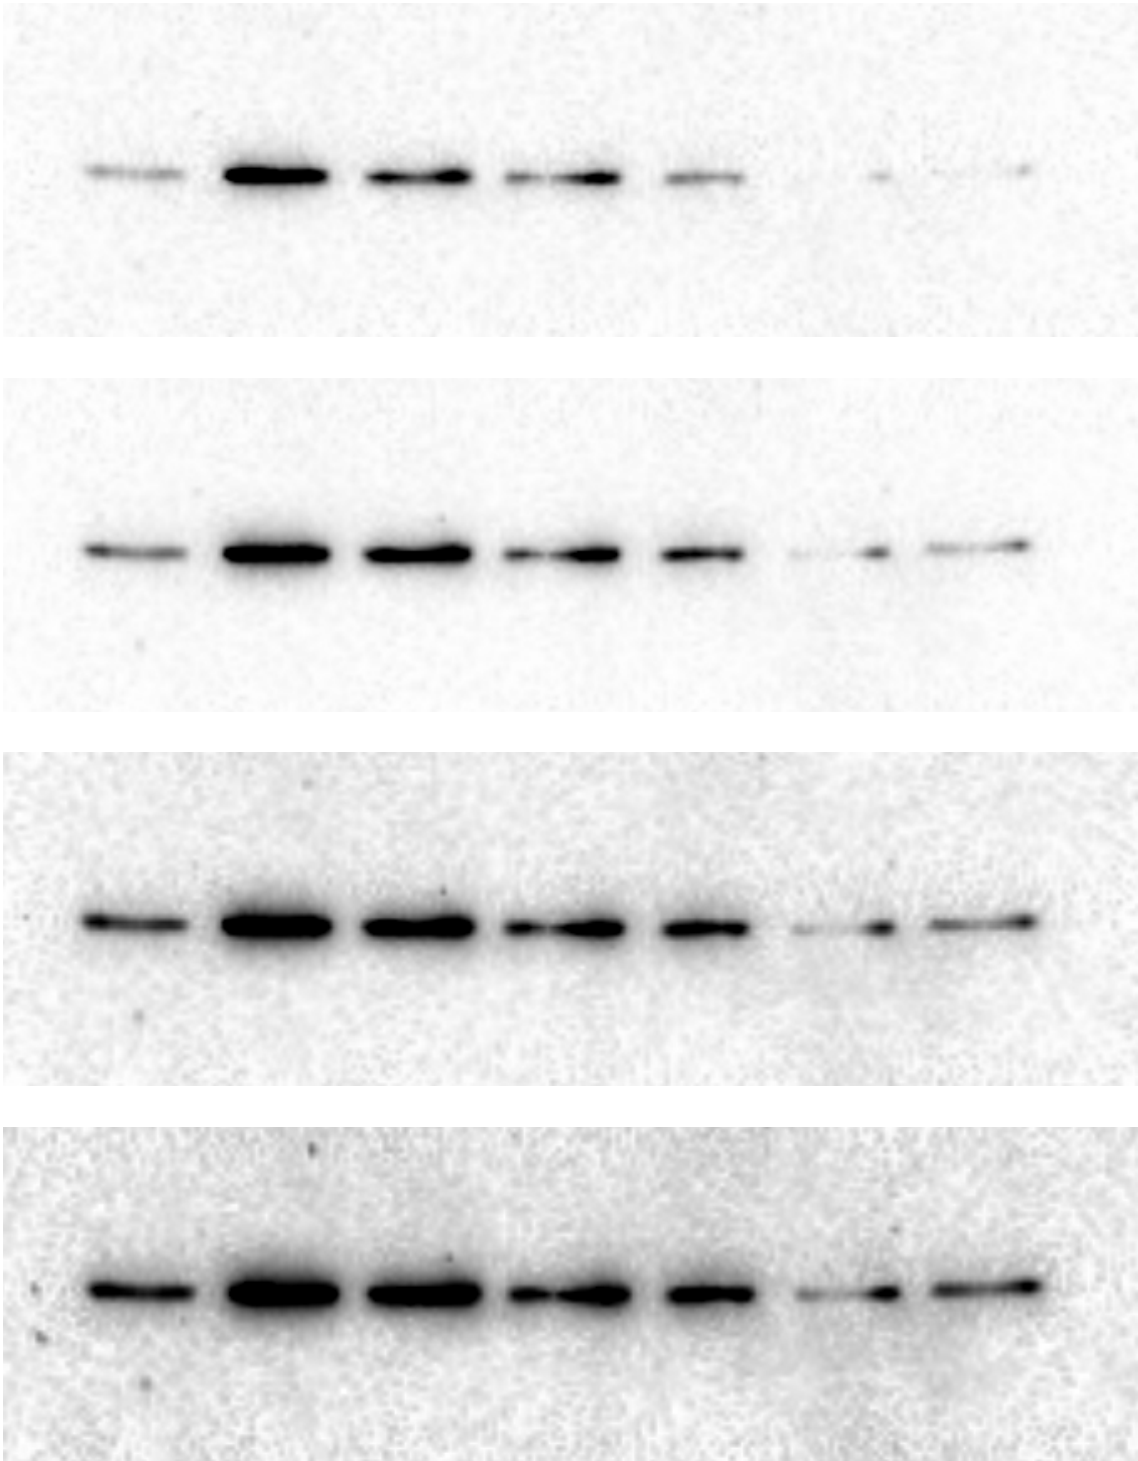

|             |   |   |   |    |    |     |    |
|-------------|---|---|---|----|----|-----|----|
| LPS         | - | + | + | +  | +  | +   | +  |
| Okanin (μM) | - | - | 1 | 10 | 30 | 100 | -  |
| MINO (μM)   | - | - | - | -  | -  | -   | 30 |

Supplementary Figure 3A. Full-length blots of NF- $\kappa$ B p65 (up) and Histone (down).

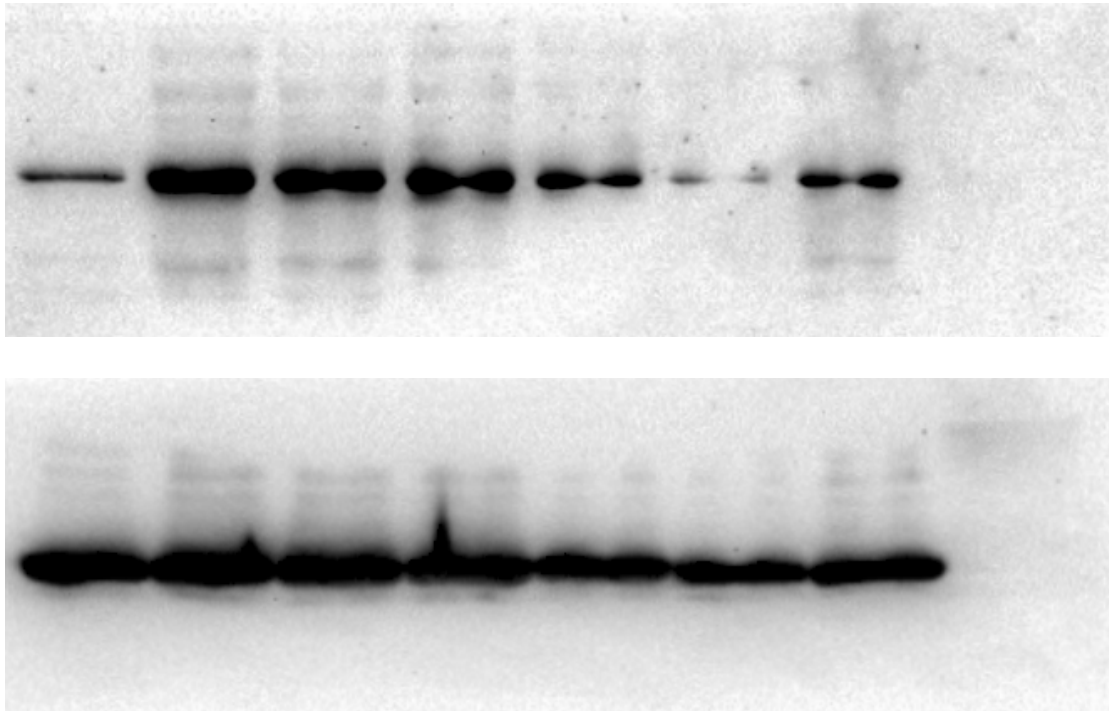

|                   |   |   |   |    |    |     |    |
|-------------------|---|---|---|----|----|-----|----|
| LPS               | - | + | + | +  | +  | +   | +  |
| Okanin ( $\mu$ M) | - | - | 1 | 10 | 30 | 100 | -  |
| MINO ( $\mu$ M)   | - | - | - | -  | -  | -   | 30 |

Supplementary Figure 3B. Multiple exposures of full-length blots of NF-κB p65.

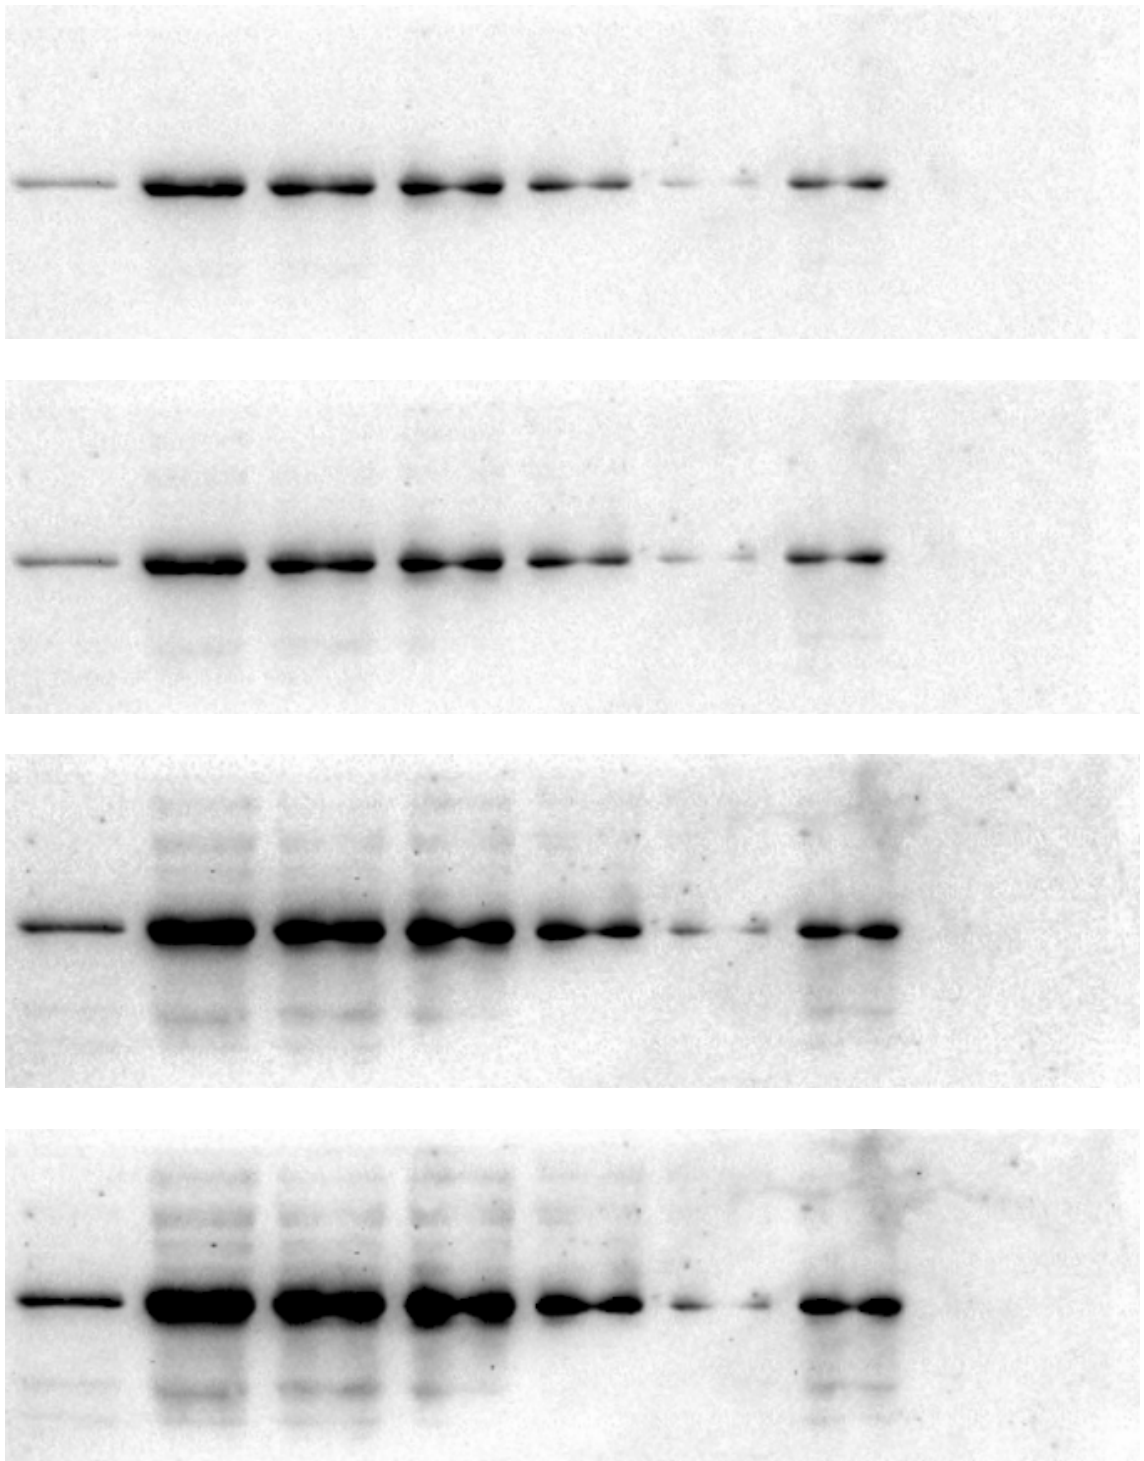

|             |   |   |   |    |    |     |    |
|-------------|---|---|---|----|----|-----|----|
| LPS         | - | + | + | +  | +  | +   | +  |
| Okanin (μM) | - | - | 1 | 10 | 30 | 100 | -  |
| MINO (μM)   | - | - | - | -  | -  | -   | 30 |

Supplementary Figure 4A. Full-length blots of TLR4 (up) and  $\beta$ -actin (down).

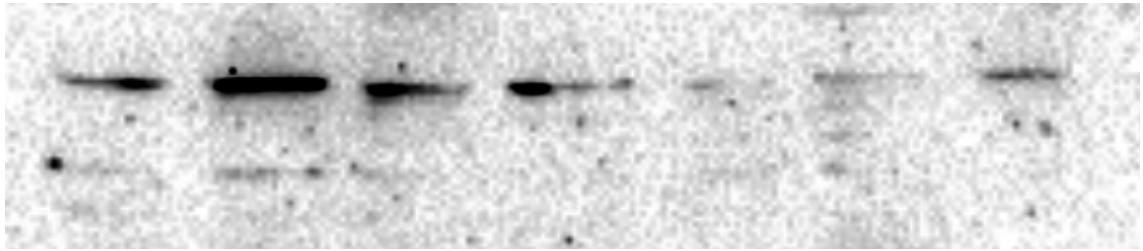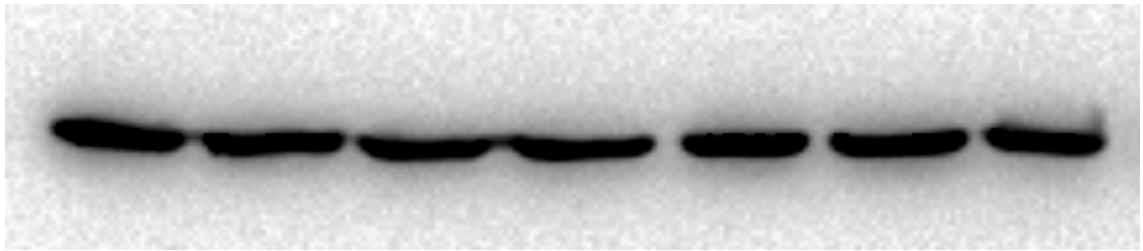

|                   |   |   |   |    |    |     |    |
|-------------------|---|---|---|----|----|-----|----|
| LPS               | - | + | + | +  | +  | +   | +  |
| Okanin ( $\mu$ M) | - | - | 1 | 10 | 30 | 100 | -  |
| MINO ( $\mu$ M)   | - | - | - | -  | -  | -   | 30 |



Supplementary Figure 8. Multiple exposures of full-length blots of TLR4.

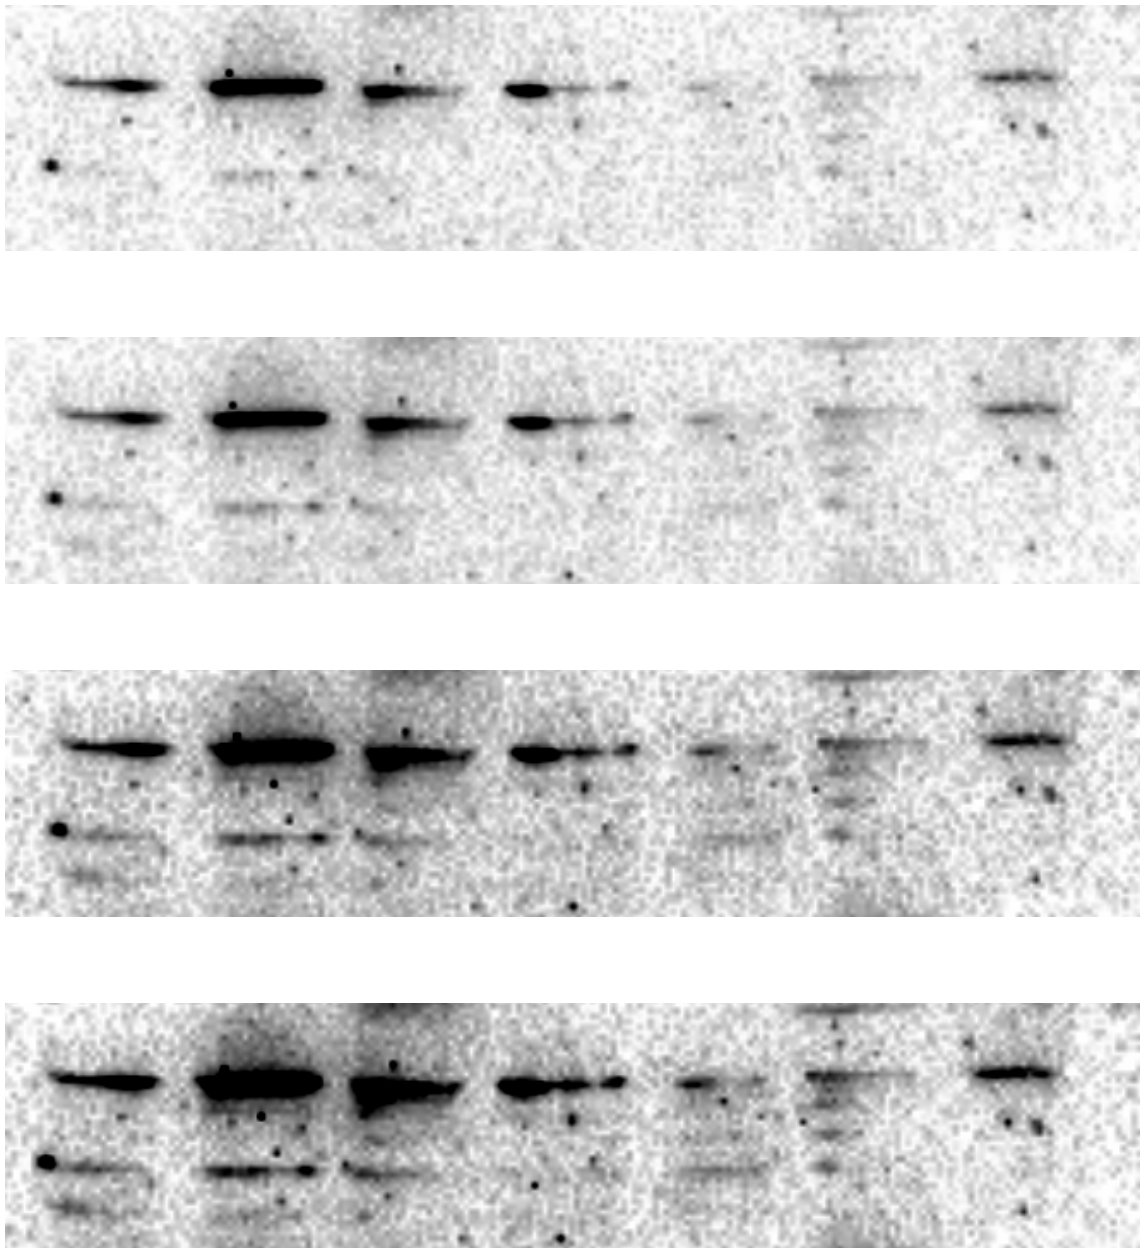

|             |   |   |   |    |    |     |    |
|-------------|---|---|---|----|----|-----|----|
| LPS         | — | + | + | +  | +  | +   | +  |
| Okanin (μM) | — | — | 1 | 10 | 30 | 100 | —  |
| MINO (μM)   | — | — | — | —  | —  | —   | 30 |
